# Supplementary material
Source: PubMed Central journal article supplement (PMC8717567)
Supplement: ao1c05521_si_001.pdf [file ao1c05521_si_001.pdf]

# SUPPORTING INFORMATION

## Aptamer sandwich assay for the detection of SARS-CoV-2 spike protein antigen

Marketa Svobodova<sup>1+</sup>, Vasso Skouridou<sup>1+</sup>, Miriam Jauset-Rubio<sup>1</sup>, Irene Viéitez<sup>2</sup>, Alberto Fernández-Villar<sup>3</sup>, Jorge Julio Cabrera Alvargonzález<sup>4</sup>, Eva Poveda<sup>5,§</sup>, Clara Benavent Bofill<sup>6</sup>, Teresa Sans<sup>6</sup>, Abdulaziz Bashammakh<sup>7</sup>, Abdulrahman O. Alyoubi<sup>7</sup> and Ciara K. O'Sullivan<sup>1,8\*</sup>

<sup>1</sup> *INTERFIBIO Research Group, Departament d'Enginyeria Química, Universitat Rovira i Virgili, Avinguda Països Catalans 26, 43007 Tarragona, Spain*

<sup>2</sup> *Rare Diseases & Pediatric Medicine Research Group, Galicia Sur Health Research Institute (IIS Galicia Sur), SERGAS-UVigo, 36213 Vigo, Spain.*

<sup>3</sup> *Pneumology Service, Galicia Sur Health Research Institute (IIS Galicia Sur), SERGAS-UVigo, 36213 Vigo, Spain.*

<sup>4</sup> *Microbiology Service, Galicia Sur Health Research Institute (IIS Galicia Sur), SERGAS-UVigo, 36213 Vigo, Spain.*

<sup>5</sup> *Group of Virology and Pathogenesis, Galicia Sur Health Research Institute (IIS Galicia Sur)-Complexo Hospitalario Universitario de Vigo, SERGAS-UVigo, 36213 Vigo, Spain.*

<sup>6</sup> *Laboratori Clinic ICS Camp de Tarragona, Hospital Universitari de Tarragona Joan XXIII Avda. Dr. Mallafré Guasch, 4, 43007 Tarragona*

<sup>7</sup> *Department of Chemistry, Faculty of Science, King Abdulaziz University, 21589 Jeddah, Kingdom of Saudi Arabia*

<sup>8</sup> *Institució Catalana de Recerca i Estudis Avancats (ICREA), Passeig Lluís Companys 23, 08010, Barcelona, Spain*

+ These authors contributed equally

§ On behalf of the Cohort COVID-19 of the Galicia Sur Health Research Institute.

\* Corresponding author: ciara.osullivan@urv.cat

## List of contents

|                                                                                                                                                                                                                                                                            |    |
|----------------------------------------------------------------------------------------------------------------------------------------------------------------------------------------------------------------------------------------------------------------------------|----|
| <b>Table S1.</b> Recombinant proteins with C-terminal His-tag used in this work. ....                                                                                                                                                                                      | S2 |
| <b>Table S2.</b> Aptamers used in this work with 5'-biotin or 5'-thiol-C6 modifications. ....                                                                                                                                                                              | S3 |
| <b>Table S3.</b> Biosensors and assays developed for the detection of the SARS-CoV-2 S antigen. ....                                                                                                                                                                       | S4 |
| <b>Figure S1.</b> Binding studies of aptamers using (a) S1 and (b) RBD proteins of SARS-CoV-2 by direct Enzyme Linked Aptamer Assay (ELAA). Biotinylated aptamers (12.8 pM - 200 nM) were used in combination with constant concentrations (2 µg/mL) of the proteins. .... | S5 |
| <b>Figure S2.</b> Checkerboard titration to optimize the concentration of Apt1T capture and Apt5B reporter aptamers for sandwich SARS-CoV-2 S1 protein detection. ....                                                                                                     | S6 |
| <b>Figure S3.</b> Sensitivity of the Apt1T/Apt5B aptamer sandwich assay for SARS-CoV-2 S1 protein detection at different concentrations of the reporter aptamer Apt5B. ....                                                                                                | S6 |
| <b>SARS-CoV-2 RNA detection in nasopharyngeal swab samples by droplet digital PCR analysis ....</b>                                                                                                                                                                        | S7 |
| <b>References</b> .....                                                                                                                                                                                                                                                    | S7 |

**Table S1.** Recombinant proteins with C-terminal His-tag used in this work.

| Human coronavirus | Protein | Protein information     | Catalog number |
|-------------------|---------|-------------------------|----------------|
| SARS-CoV-2        | S1      | Val16-Arg685, 76.5 kDa  | 40591-V08B1    |
|                   | RBD     | Arg319-Phe541, 26.5 kDa | 40592-V08H     |
| SARS-CoV          | S1      | Met1-Arg667, 74.4 kDa   | 40150-V08B1    |
| MERS-CoV          | S1      | Met1-Glu725, 79.9 kDa   | 40069-V08B1    |
| HCoV-NL63         | S1      | Cys19-Val717, 78.8 kDa  | 40600-V08H     |
| HCoV-HKU1         | S1      | Ala13-Arg756, 85.2 kDa  | 40602-V08H     |
| HCoV-OC43         | S1      | Met1-Leu794, 89.0 kDa   | 40607-V08H1    |
| HCoV-229E         | S1      | Cys16-Asn536, 58.3 kDa  | 40601-V08H     |

**Table S2.** Aptamers used in this work with 5'-biotin or 5'-thiol-C6 modifications.

| <b>Aptamer</b> | <b>Sequence (5' – 3')</b>                                                         | <b>Length (nt)</b> | <b>% GC</b> |
|----------------|-----------------------------------------------------------------------------------|--------------------|-------------|
| Apt1           | ATCCAGAGTGACGCAGCACCGACCTTGTGCTTTGGGAGTGCTGG<br>TCCAAGGGCGTTAATGGACACGGTGGCTTAGT  | 76                 | 56.6        |
| Apt2           | ATCCAGAGTGACGCAGCATCGAGTGGTGGGCTGGTCGGGTTTGG<br>ATTCCCTTAGATGCTGGACACGGTGGCTTAGT  | 76                 | 56.6        |
| Apt3           | ATCCAGAGTGACGCAGCACTGCGTAGGCGCGGCCAATGTGTAGG<br>ATTGCTCAGGTCTGCTGGACACGGTGGCTTAGT | 77                 | 58.4        |
| Apt4           | ATCCAGAGTGACGCAGCATTTTCATCGGGTCCAAAAGGGGCTGCT<br>CGGGATTGCGGATATGGACACGGTGGCTTAGT | 76                 | 55.3        |
| Apt5           | ATCCAGAGTGACGCAGCAGGACTGCTTAGGATTGCGAAGCTGAG<br>GAGCTCCCCCGCCTTGGACACGGTGGCTTAGT  | 76                 | 59.2        |
| Apt6           | ATCCAGAGTGACGCAGCAGTAGGGGGATTGGCTCCAGGGCCTGG<br>CTGACGGTTGCACGTGGACACGGTGGCTTAGT  | 76                 | 61.8        |
| Apt1C          | CAGCACCGACCTTGTGCTTTGGGAGTGCTGGTCCAAGGGCGTTA<br>ATGGACA                           | 51                 | 56.9        |
| Apt4C          | ATCCAGAGTGACGCAGCATTTTCATCGGGTCCAAAAGGGGCTGCT<br>CGGGATTGCGGATATGGACACGT          | 67                 | 55.2        |

**Table S3.** Biosensors and assays developed for the detection of the SARS-CoV-2 S antigen.

| Platform                              | Biorecognition molecule                                 | Target | Sensitivity (LOD)                                       | Reference                                                    |
|---------------------------------------|---------------------------------------------------------|--------|---------------------------------------------------------|--------------------------------------------------------------|
| Lateral flow assay                    | Sialic acids – sialic acids/gold nanoparticles sandwich | S1     | 5 µg/mL in buffer                                       | 1. Baker et al., ACS Centr. Sci. 2020, 6, 2046-2052          |
| Field-effect transistor biosensor     | Antibody immobilized on graphene                        | S1     | 1 fg/mL in buffer<br>100 fg/mL in VTM                   | 2. Seo et al., ACS Nano 2020, 14, 5135-5142                  |
| Colorimetric assay                    | Antibody immobilized on gold nanoparticles              | S      | 1 ng/mL in buffer (visual)                              | 3. Pramanik et al., Nanoscale Adv. 2021, 3, 1588-1596        |
| SERS assay                            |                                                         |        | 4 pg/mL in buffer                                       |                                                              |
| Plasmonic biosensor                   | Antibody immobilized on gold nanoparticles              | S1     | 4.2 fM in buffer                                        | 4. Ahmadvand et al., Biosens. Bioelectron. 2021, 117, 112971 |
| Magnetic particle spectroscopy assay  | Antibody immobilized on magnetic nanoparticles          | RBD    | 84 pM in buffer                                         | 5. Zhong et al., ACS Sens. 2021, 6, 976-984.                 |
| Lateral flow assay                    | ACE2 – antibody/gold nanoparticles conjugate sandwich   | S1     | 50 ng/mL in buffer                                      | 6. Lee et al., Biosens. Bioelectron. 2021, 171, 112715       |
| Near-Infrared biosensor               | ACE2 immobilized on single-walled carbon nanotubes      | RBD    | 12.6 nM in buffer                                       | 7. Pinals et al., Nano Lett. 2021, 21, 2272-2280             |
| Direct colorimetric assay             | Biotinylated aptamer                                    | S      | 2 nM in buffer                                          | 8. Gupta et al., Mol. Ther. Nucleic Acids 2021, 26, 321-332  |
| Electrochemical aptasensor            | Aptamer with methylene blue label                       | S1     | 35.4 pM in buffer                                       | 9. Idili et al., ACS Sens. 2021, 6, 3093-3101                |
| Plasmonic aptasensor                  | Biotinylated aptamer                                    | S1+S2  | 37 nM in buffer                                         | 10. Cennamo et al., Talanta 2021, 122532                     |
| Electrochemical aptasensor            | Aptamer with methylene blue label                       | S1     | 1 ag/mL in buffer                                       | 11. Zakashansky et al., Anal. Methods 2021, 13, 874          |
| Gold nanoparticles colorimetric assay | Thiolated aptamer                                       | S1     | 16 nM in buffer                                         | 12. Aithal et al., Talanta 2022, 122841                      |
| Microplate assay                      | Aptamers sandwich                                       | S1     | 21 ng/mL (270 pM) in buffer<br>15 ng/mL (190 pM) in VTM | This work                                                    |

*ACE2: angiotensin-converting enzyme II; S1: S1 subunit of SARS-CoV-2 spike protein; S2: S2 subunit of SARS-CoV-2; RBD: receptor-binding domain of SARS-CoV-2 spike protein; S: SARS-CoV-2 spike protein; SERS: surface enhanced Raman spectroscopy; VTM: viral transport medium.*

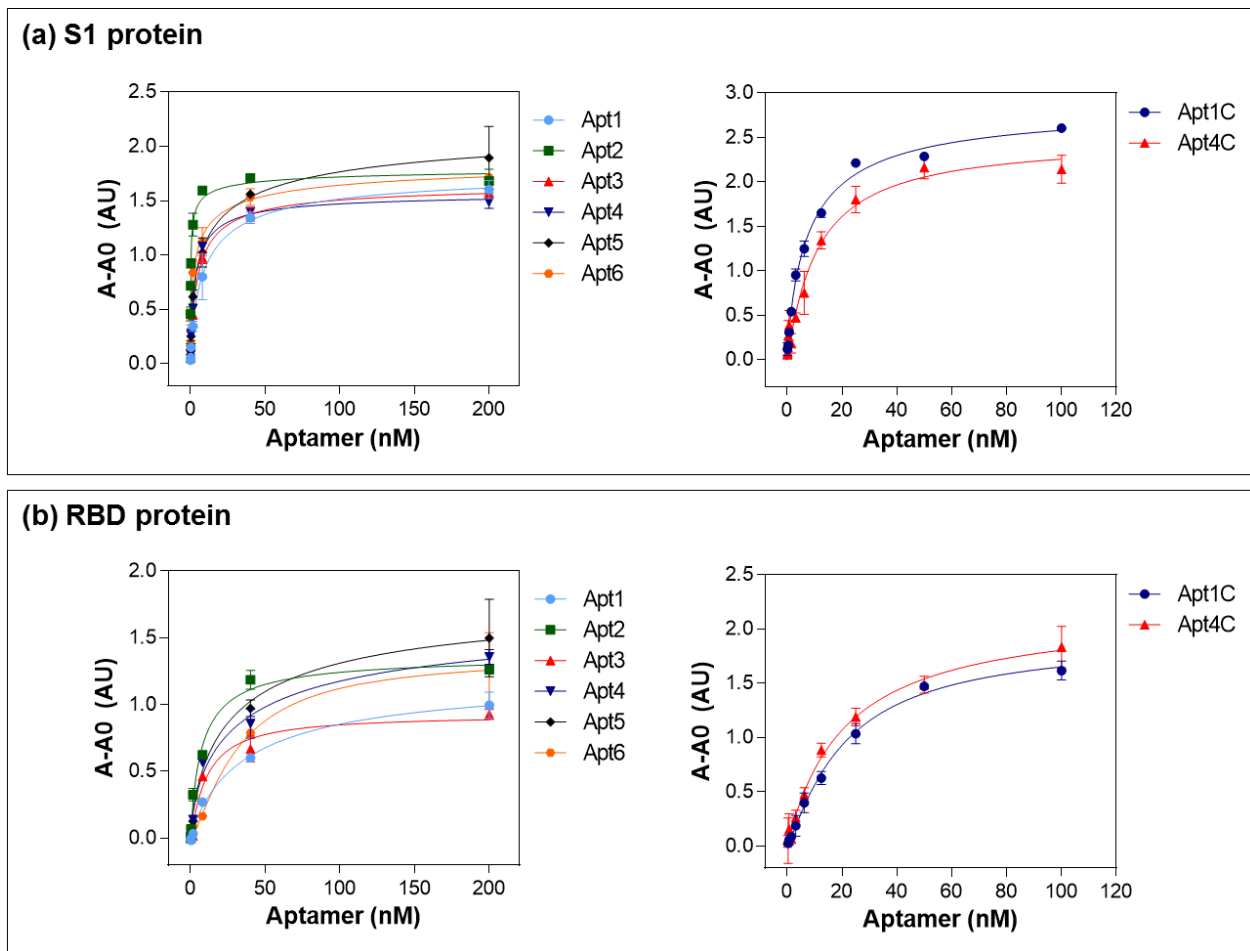

**Figure S1.** Binding studies of aptamers using (a) S1 and (b) RBD proteins of SARS-CoV-2 by direct Enzyme Linked Aptamer Assay (ELAA). Biotinylated aptamers (12.8 pM - 200 nM) were used in combination with constant concentrations (2  $\mu$ g/mL) of the proteins.

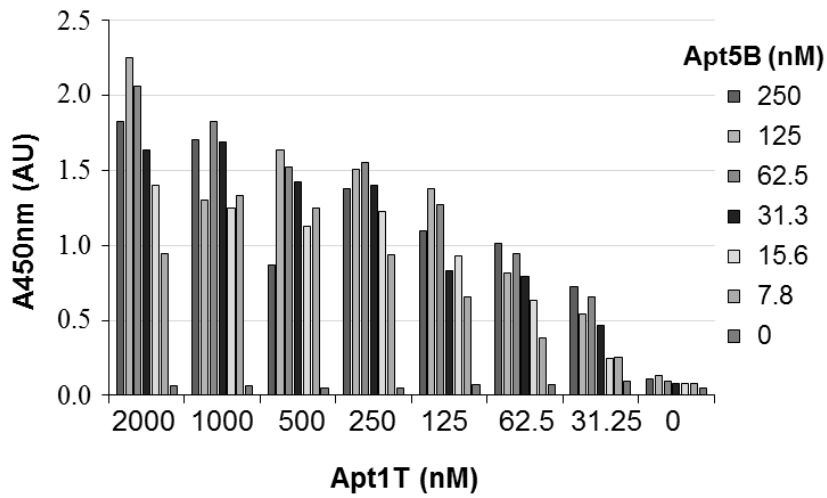

**Figure S2.** Checkerboard titration to optimize the concentration of Apt1T capture and Apt5B reporter aptamers for sandwich SARS-CoV-2 S1 protein detection.

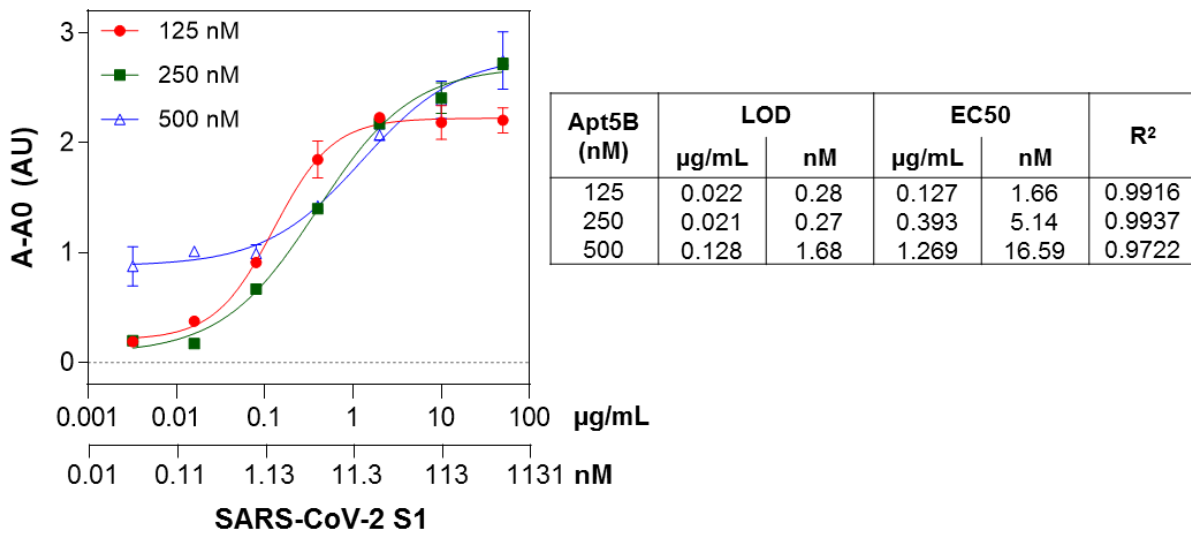

**Figure S3.** Sensitivity of the Apt1T/Apt5B aptamer sandwich assay for SARS-CoV-2 S1 protein detection at different concentrations of the reporter aptamer Apt5B.

## **SARS-CoV-2 RNA detection in nasopharyngeal swab samples by droplet digital PCR analysis**

SARS-CoV-2 RNA quantification was performed at Galicia Sur Health Research Institute Laboratories. Viral RNA was extracted from nasopharyngeal swab samples with the QIAmp viral RNA mini kit (QIAGEN, Hilden, Germany) by the automatized QIAcube system (QIAGEN, Hilden, Germany), and their quantification was performed by QX200 droplet digital PCR System (Bio-Rad Laboratories) using a one-step reverse transcription (One-Step RT-ddPCR Advanced Kit for Probes, Bio-Rad Laboratories) and a triplex probe assay for the PCR amplification (2019-nCoV CDC ddPCR Triplex Probe Assay, Bio-Rad Laboratories). This assay contains in a single tube the primers and probes reported by Chinese CDC that targets two regions of the SARS-CoV-2 nucleocapsid gene (N1 and N2) as well as primers and probe for the human RNase P (*RPP30*). The results obtained were analyzed using the QuantaSoft Analysis Pro Software (Bio-Rad Laboratories). A sample was considered positive for SARS-CoV-2 if it had a minimal concentration of N (N1 and/or N2) of 0.1 copies/ $\mu$ L of 1X ddPCR reaction, and two or more positive droplets for N1 and/or N2 per well.

## **References**

1. Baker, A. N.; Richards, S. J.; Guy, C. S.; Congdon, T. R.; Hasan, M.; Zwetsloot, A. J.; Gallo, A.; Lewandowski, J. R.; Stansfeld, P. J.; Straube, A.; Walker, M.; Chessa, S.; Pergolizzi, G.; Dedola, S.; Field, R. A.; Gibson, M. I. The SARS-COV-2 spike protein binds sialic acids and enables rapid detection in a lateral flow point of care diagnostic device. *ACS Cent. Sci.* **2020**, *6*, 2046–2052.
2. Seo, G.; Lee, G.; Kim, M. J.; Baek, S. H.; Choi, M.; Ku, K. B.; Lee, C. S.; Jun, S.; Park, D.; Kim, H. G.; Kim, S. H.; Lee, J. O.; Kim, B. T.; Park, E. C.; Kim, S. I. Rapid detection of COVID-19 causative virus (SARS-CoV-2) in human nasopharyngeal swab specimens using field-effect transistor-based biosensor. *ACS Nano* **2020**, *14*, 5135–5142.
3. Pramanik, A.; Gao, Y.; Patibandla, S.; Mitra, D.; McCandless, M. G.; Fassero, L. A.; Gates, K.; Tandon, R.; Ray, R. C. The rapid diagnosis and effective inhibition of coronavirus using spike antibody attached gold nanoparticles. *Nanoscale Adv.* **2021**, *3*, 1588–1596.
4. Ahmadivand, A.; Gerislioglu, B.; Ramezani, Z.; Kaushik, A.; Manickam, P.; Ghoreishi, S. A. Functionalized terahertz plasmonic metasensors: femtomolar-level detection of SARS-CoV-2 spike proteins. *Biosens. Bioelectron.* **2021**, *117*, 112971.
5. Zhong, J.; Rösch, E. L.; Viereck, T.; Schilling, M.; Ludwig, F. Toward rapid and sensitive detection of SARS-CoV-2 with functionalized magnetic nanoparticles. *ACS Sens.* **2021**, *6*, 976–984.
6. Lee, J. H.; Choi, M.; Jung, Y.; Lee, S. K.; Lee, C. S.; Kim, J.; Kim, J.; Kim, N. H.; Kim, B. T.; Kim, H. G. A novel rapid detection for SARS-CoV-2 spike 1 antigens using human angiotensin converting enzyme 2 (ACE2). *Biosens. Bioelectron.* **2021**, *171*, 112715.
7. Pinals, R. L.; Ledesma, F.; Yang, D.; Navarro, N.; Jeong, S.; Pak, J. E.; Kuo, L.; Chuang, Y. C.; Cheng, Y. W.; Sun, H. Y.; Landry, M. P. Rapid SARS-CoV-2 spike protein detection by carbon nanotube-based near-infrared nanosensors. *Nano Lett.* **2021**, *21*, 2272–2280.

8. Gupta, A.; Anand, A.; Jain, N.; Goswami, S.; Anantharaj, A.; Patil, S.; Singh, R.; Kumar, A.; Shrivastava, R.; Bhatnagar, S.; Medigeshi, G. R.; Sharma T. K; DBT India Consortium for COVID-19 Research. A novel G-quadruplex aptamer-based spike trimeric antigen test for the detection of SARS-CoV-2. *Mol. Ther. Nucleic Acids* **2021**, *26*, 321–332.
9. Idili, A.; Parolo, C.; Alvarez-Diduk, R.; Merkoçi, A. Rapid and efficient detection of the SARS-CoV-2 spike protein using an electrochemical aptamer-based sensor. *ACS Sens.* **2021**, *6*, 3093–3101.
10. Cennamo, N.; Pasquardini, L.; Arcadio, F.; Lunelli, L.; Vanzetti, L.; Carafa, V.; Altucci, L.; Zeni, L. SARS-CoV-2 spike protein detection through a plasmonic D-shaped plastic optical fiber aptasensor. *Talanta* **2021**, *233*, 122532.
11. Zakashansky, J. A.; Imamura, A. H.; Salgado, D. F. 2<sup>nd</sup>; Romero Mercieca, H. C.; Aguas, R. F. L.; Lao, A. M.; Pariser, J.; Arroyo-Currás, N.; Khine, M. Detection of the SARS-CoV-2 spike protein in saliva with Shrinky-Dink electrodes. *Anal. Methods* **2021**, *13*, 874–883.
12. Aithal, S.; Mishriki, S.; Gupta, R.; Sahu, R. P.; Botos, G.; Tanvir, S.; Hanson, R. W.; Puri, I. K. SARS-CoV-2 detection with aptamer-functionalized gold nanoparticles. *Talanta* **2022**, *236*, 122841.
